# Supplementary material for: Dysbiosis of skin microbiome and gut microbiome in melanoma progression
Source: PubMed Central journal article supplement (PMC8881828; doi:10.1186/s12866-022-02458-5), 2022-02-25
Supplement: 12866_2022_2458_MOESM4_ESM.pdf [file 12866_2022_2458_MOESM4_ESM.pdf]

**A** PCoA based on Bray-Curtis distance

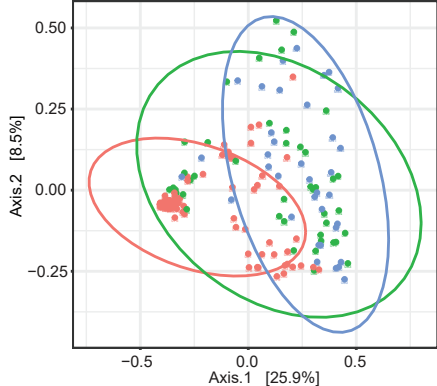

- healthy\_skin
- melanoma\_surface
- melanoma\_tissue

**B**

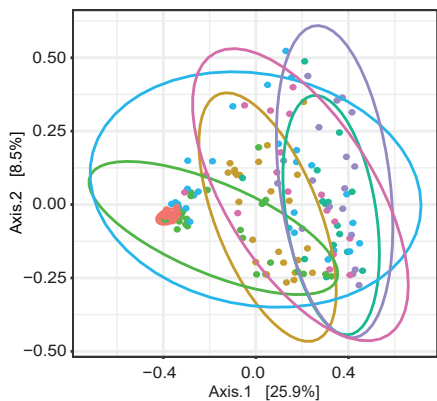

- healthy\_skin\_control
- healthy\_skin\_progression
- healthy\_skin\_regression
- melanoma\_surface\_progression
- melanoma\_surface\_regression
- melanoma\_tissue\_progression
- melanoma\_tissue\_regression

**C**

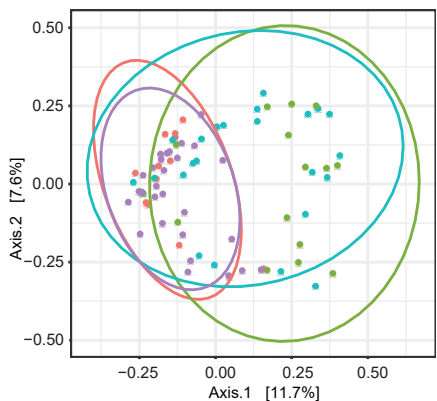

- crossbred\_regression
- MeLiM\_regression
- MeLiM\_progression
- white\_control
