# Supplementary material for: Dysbiosis of skin microbiome and gut microbiome in melanoma progression
Source: PubMed Central journal article supplement (PMC8881828; doi:10.1186/s12866-022-02458-5), 2022-02-25

healthy\_skin melanoma\_tissue

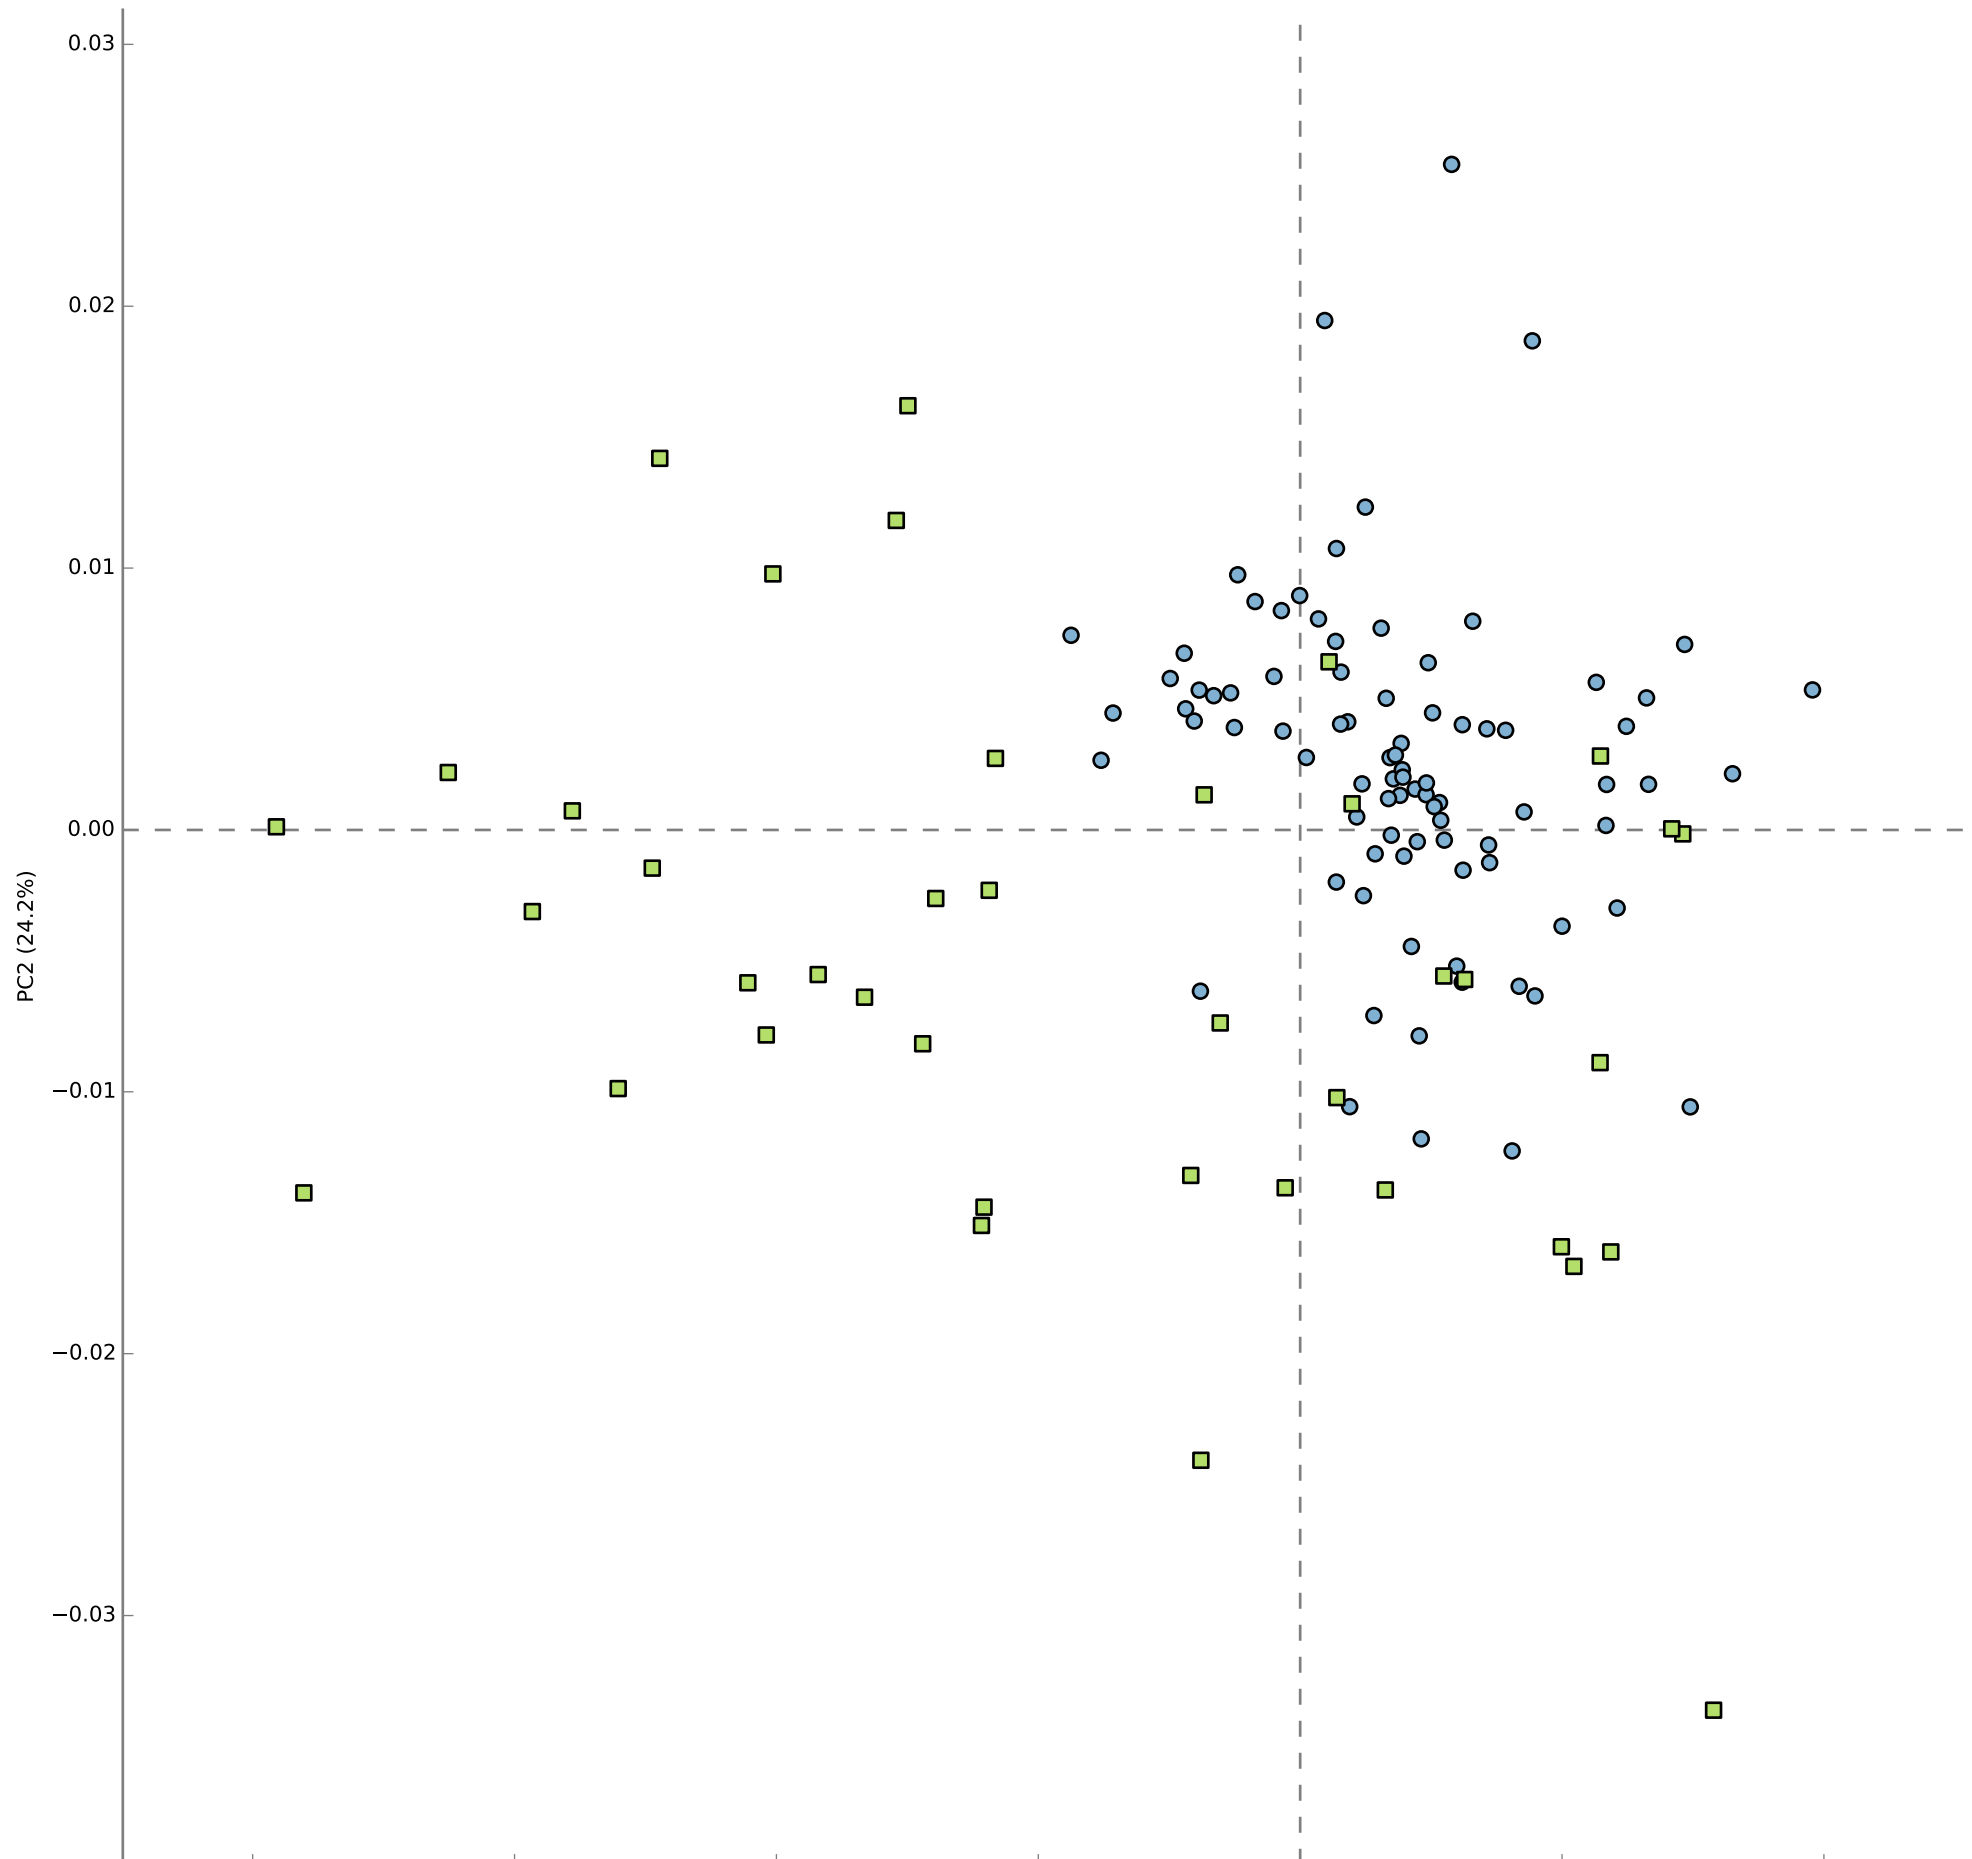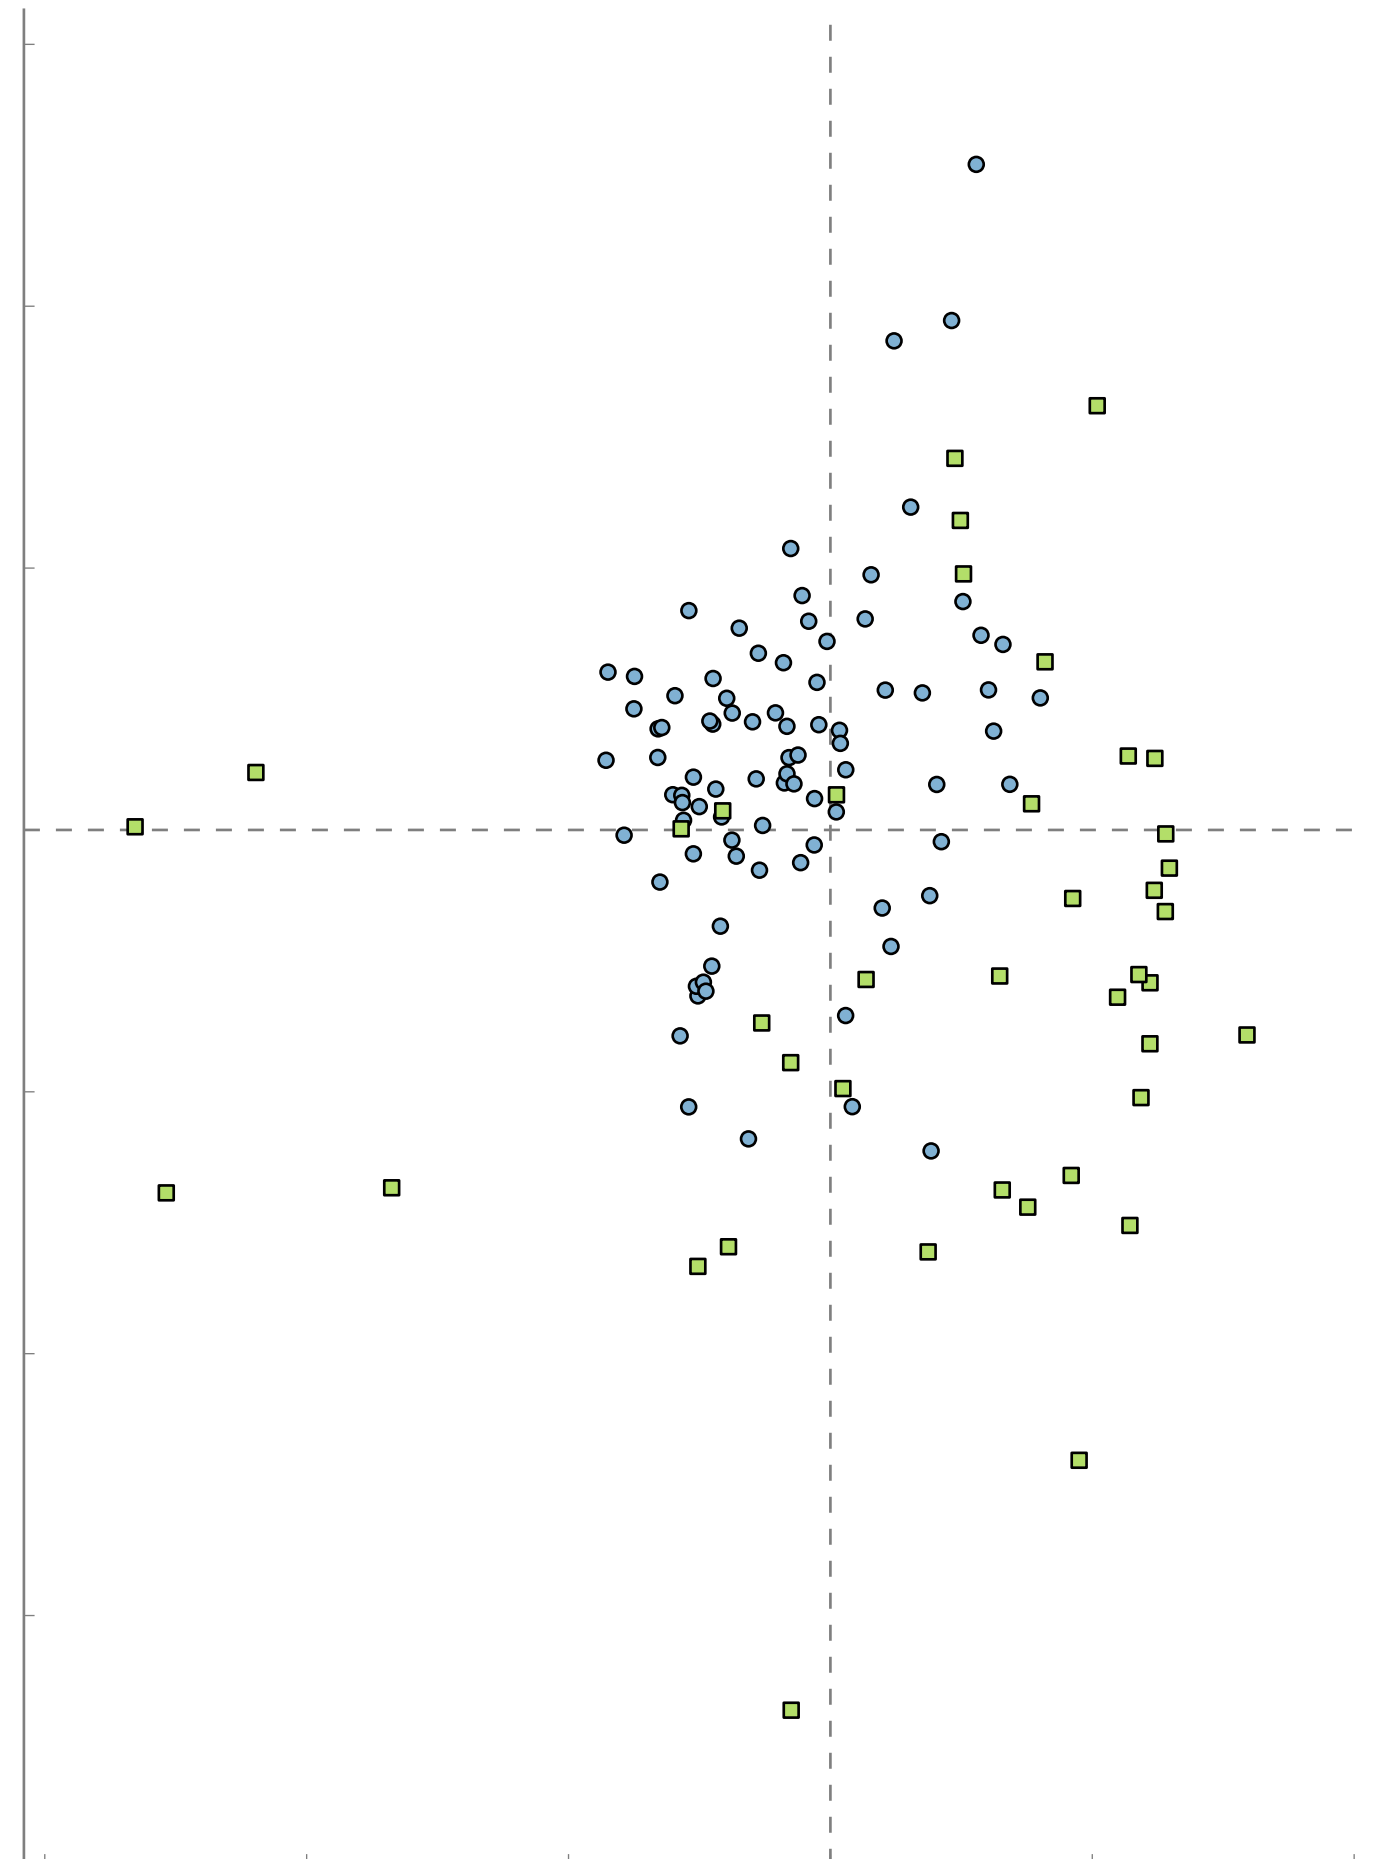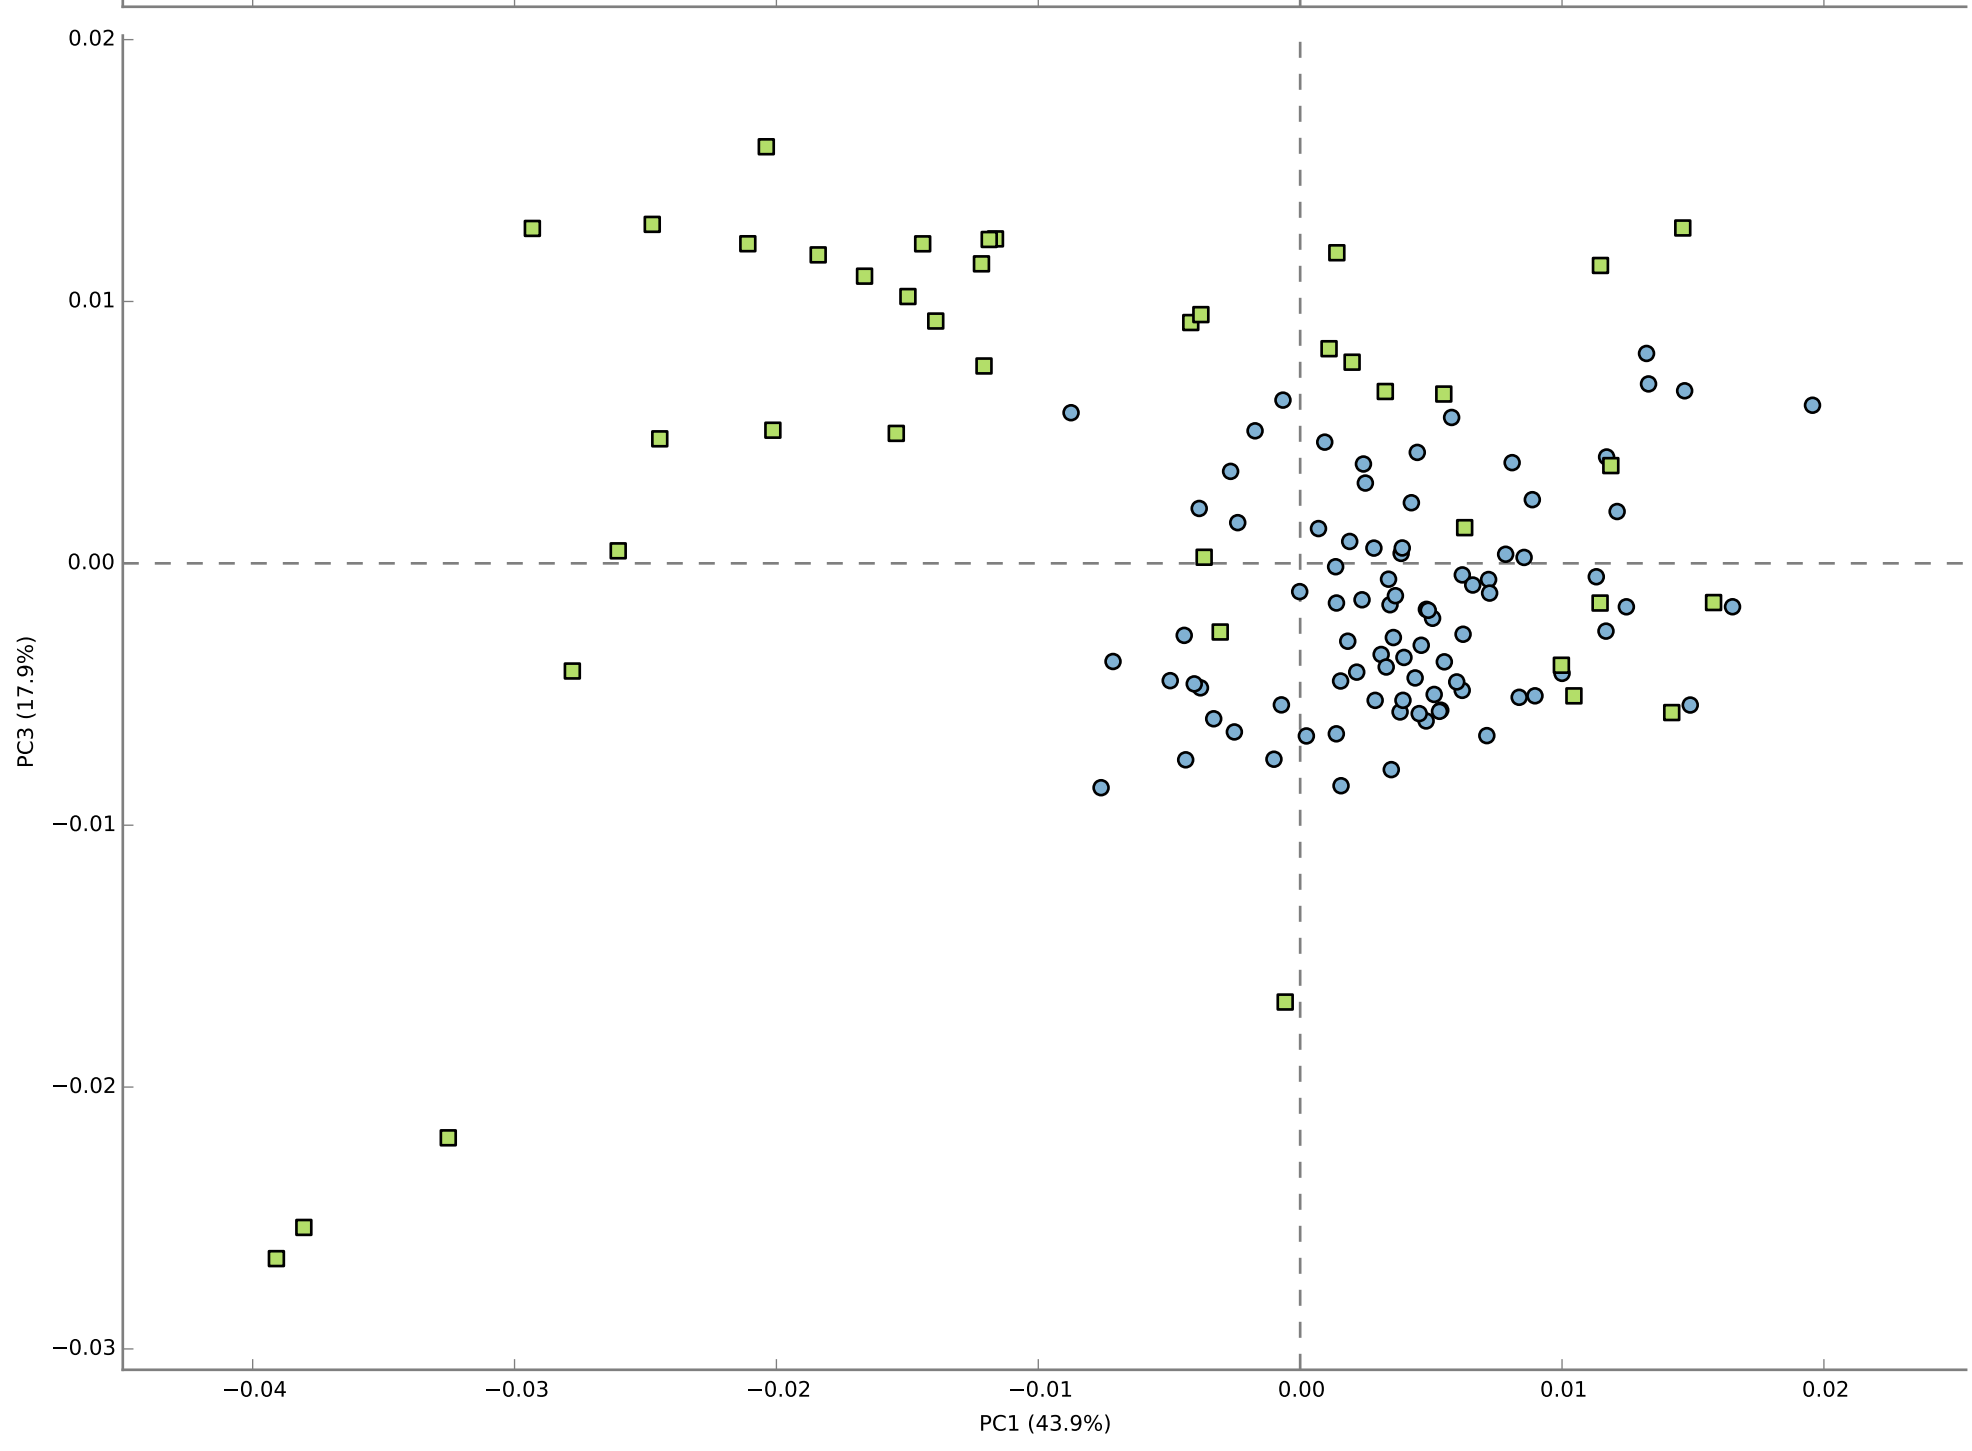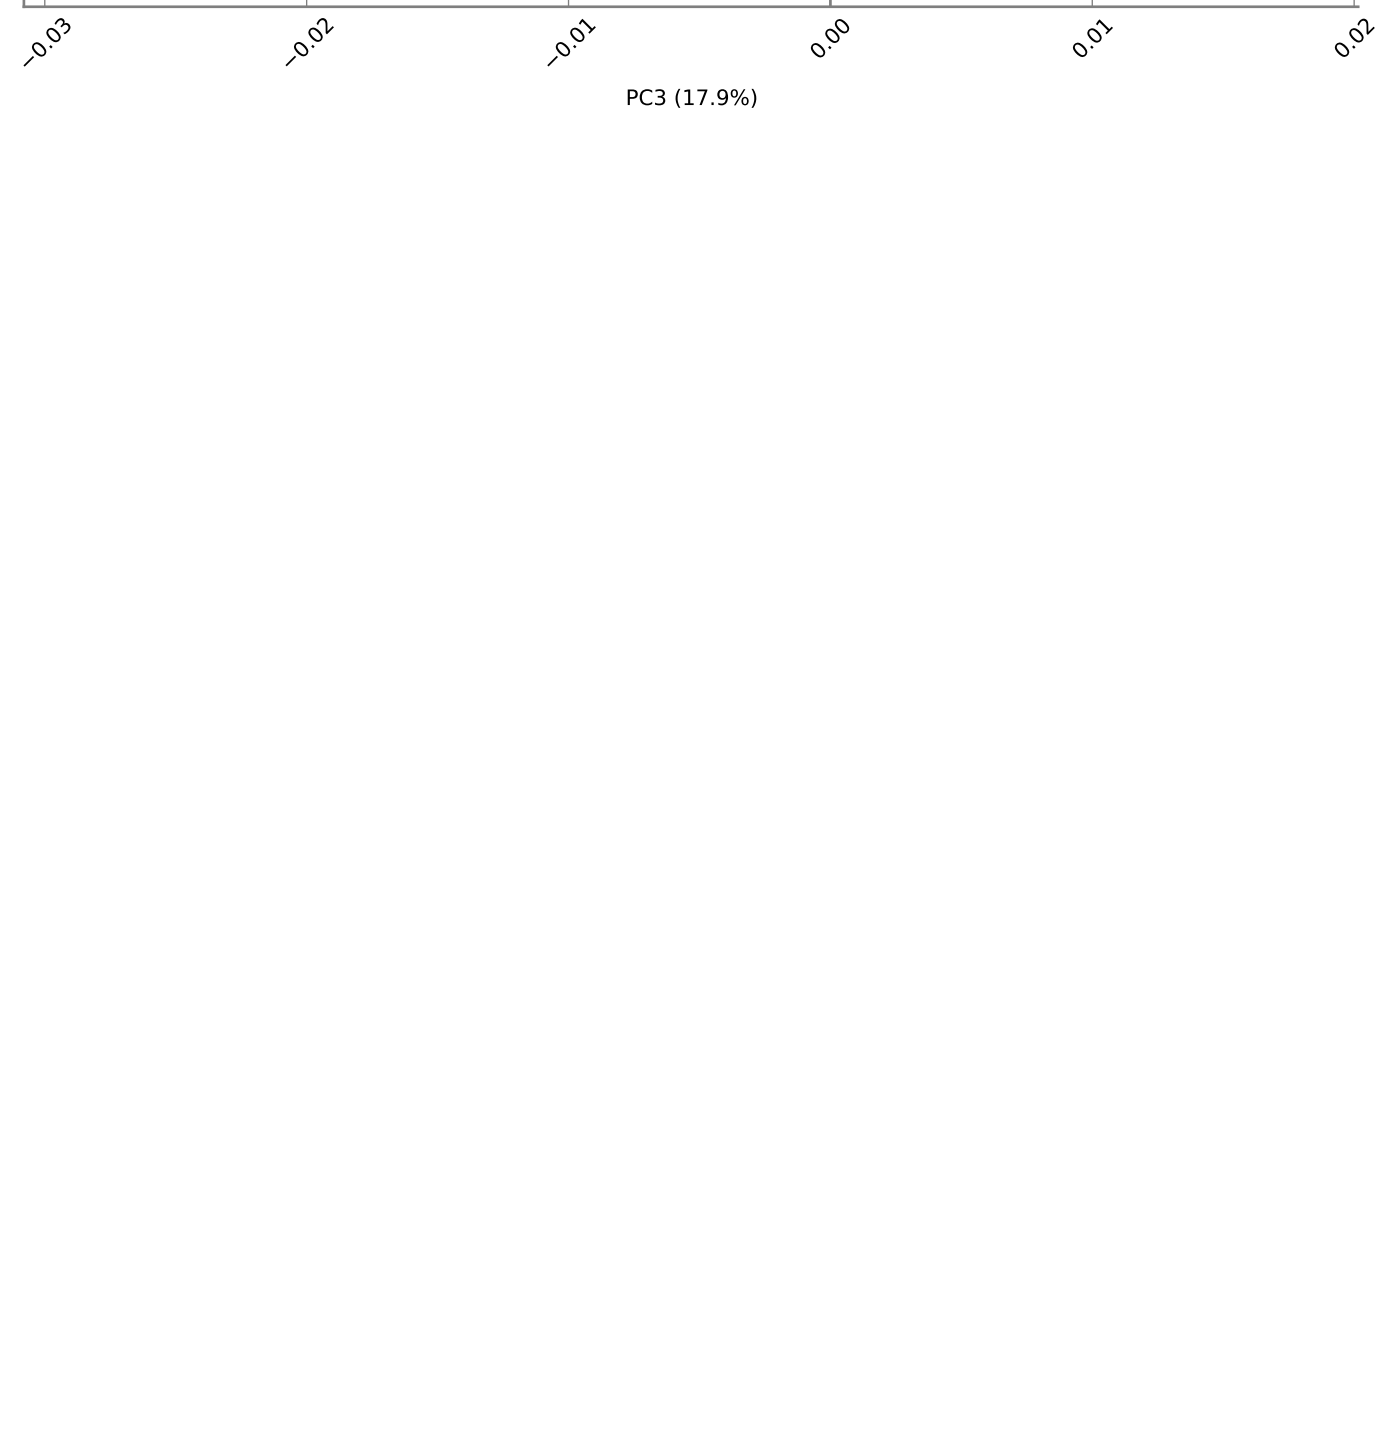

Supplement: 12866_2022_2458_MOESM13_ESM.pdf [file 12866_2022_2458_MOESM13_ESM.pdf]
